# Supplementary material for: Significant structural change in human c-Myc promoter G-quadruplex upon peptide binding in potassium
Source: Royal Society of Chemistry journal article supplement (doi:10.1039/d2ra00535b), 2022-01-01
Supplement: d2ra00535b1.pdf [file d2ra00535b1.pdf]

**Significant structural change in human c-Myc promoter G-quadruplex upon peptide binding in potassium**

Nikita Kundu<sup>a</sup>, Taniya Sharma<sup>a</sup>, Sarvpreet Kaur<sup>a</sup>, Mamta Singh<sup>b</sup>, Vinit Kumar<sup>b</sup>, Uttam Sharma<sup>c</sup>,  
Aklank Jain<sup>c</sup>, Jadala Shankaraswamy<sup>d</sup>, Daisuke Miyoshi<sup>e</sup>, Sarika Saxena<sup>a\*</sup>

<sup>a</sup>Amity Institute of Biotechnology, Amity University Uttar Pradesh, Noida 201313, India.

<sup>b</sup>Amity Institute of Molecular Medicine and Stem Cell Research, Amity University Uttar Pradesh, Noida 201313, India.

<sup>c</sup>Department of Animal Sciences, Central University of Punjab, Bathinda.

<sup>d</sup>Department of Fruit Science, College of Horticulture, Mojerla, Sri Konda Laxman Telangana State Horticultural University, 509382, Telangana, India.

<sup>e</sup>Faculty of Frontiers of Innovative Research in Science and Technology (FIRST), Konan University, 7-1-20 Minatojima-minamimachi, Chuo-ku, Kobe, Hyogo 650-0047, Japan.

Note: Nikita Kundu, Taniya Sharma, and Sarvpreet Kaur share equal contribution.

**Address of Correspondence:** Structural Biology Lab, Sector-125, Expressway Highway, Amity Institute of Biotechnology, Amity University Uttar Pradesh, Noida 201313, India. Phone Number: 0120-4735600,

**Email:** ssaxena1@amity.edu; sarikaigib@yahoo.co.in.

## Supporting Information

### Table of Contents

2

1. **Figure S1** Normalized UV melting curves of 4  $\mu$ M c-Myc promoter G4 in buffer containing 100 mM KCl with 40 wt% PEG 200 and 100 mM KCl with 20 wt% PEG 8000. 3
2. **Figure S2** Native Gel Electrophoresis of 4 $\mu$ M HTPu.HTPy (Duplex) in 30 mM sodium cacodylate buffer (pH 7.0) and HTPy (pH 5.7) with and without peptide 4
3. **Figure S3:** Emission spectra of QW10 peptide with HTPu.HTPy duplex in buffer (pH 7.0) (a) and HTPy in buffer (pH 5.7) with and without peptide 5
4. **Figure S4.** QW10 demonstrated the normal effects on human embryonic kidney cells HEK-2 (A). 6

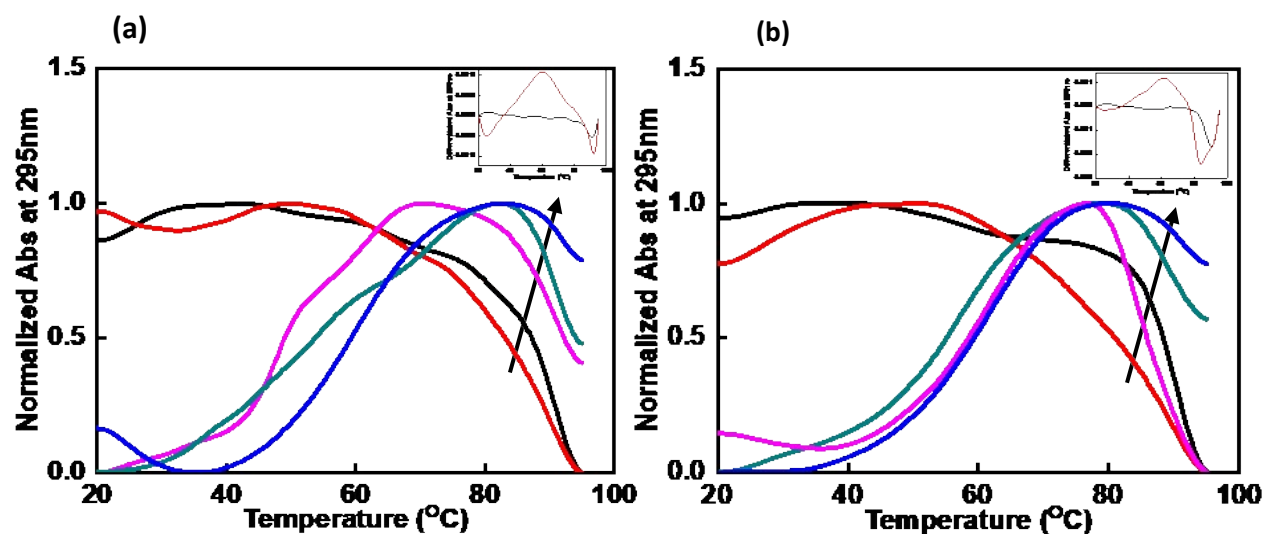

**Figure S1** Normalized UV melting curves of 4  $\mu$ M c-Myc promoter G4 in buffer containing 100 mM KCl with 40 wt% PEG 200 (a) and 100 mM KCl with 20 wt% PEG 8000 (b), 0.5 mM EDTA without any additive (black line), c-Myc promoter G4:QW10 ratio (1:1) (red line), (1:2) (pink line), (1:5) (green line) and (1:10) (blue line).

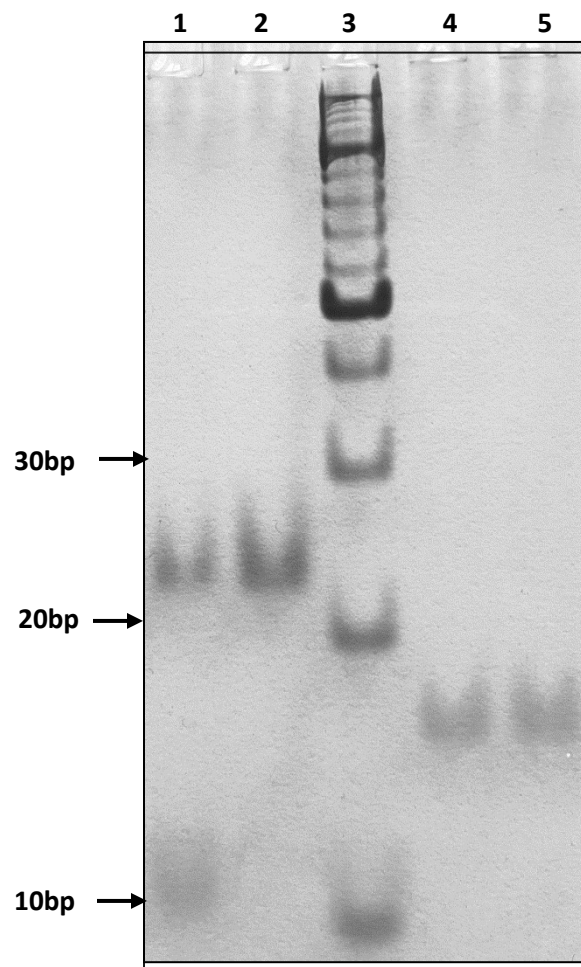

**Figure S2:** Native Gel Electrophoresis of 4 $\mu$ M HTPu.HTPy (Duplex) in 30 mM sodium cacodylate buffer (pH 7.0) and HTPy (pH 5.7), 1 mM EDTA, 100 mM KCl. Lane 1 is DNA duplex: peptide (1:10), Lane 2 is DNA duplex, Lane 3 is 10 bp ladder, Lane 4 is HTPy: Peptide (1:10) and Lane 5 is HTPy only.

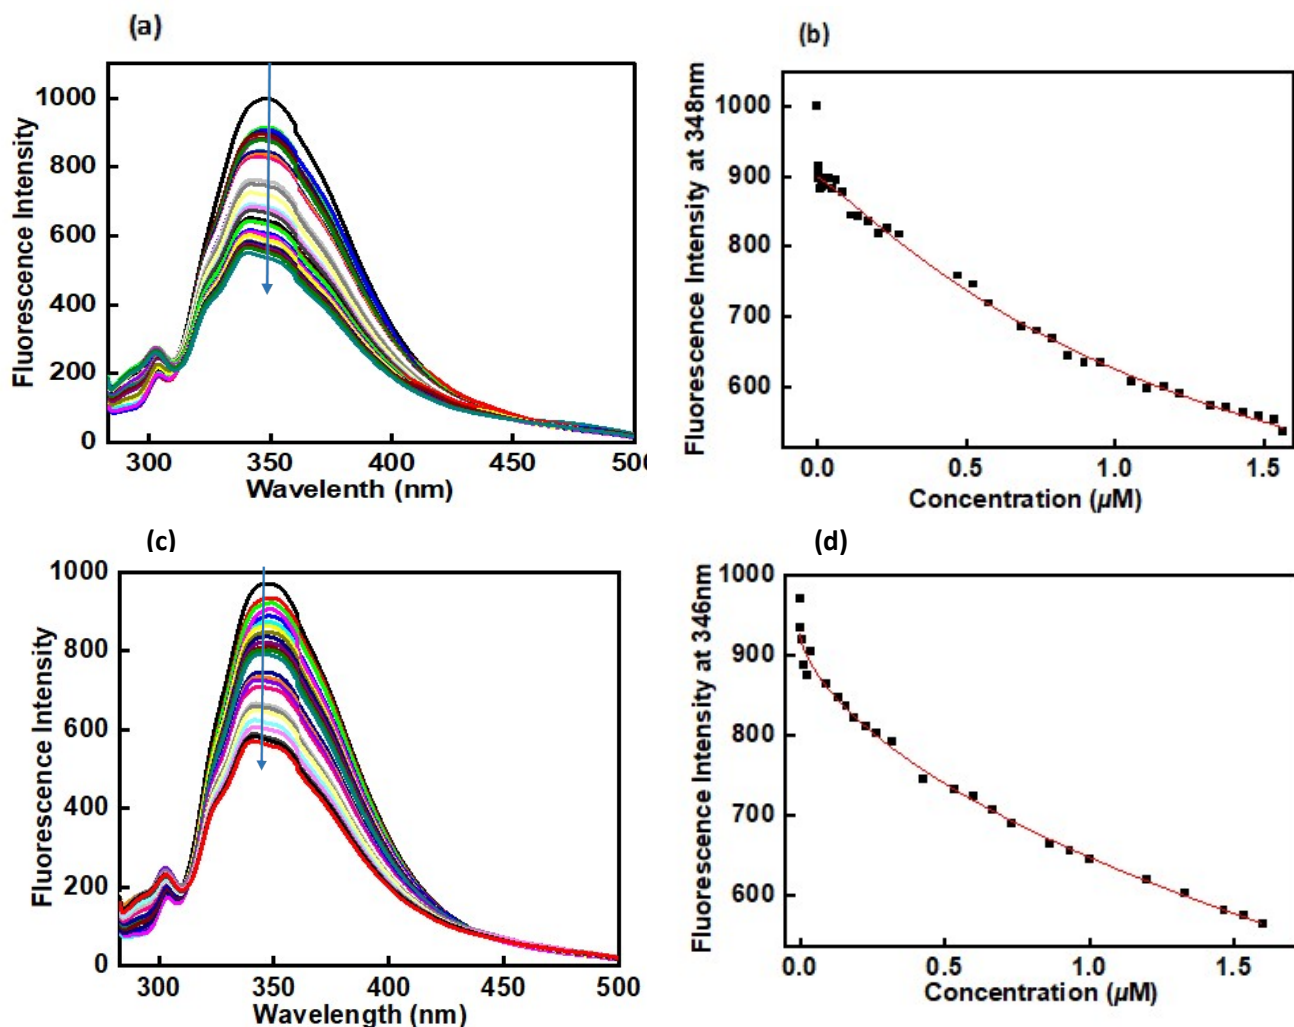

**Figure S3:** Emission spectra of QW10 peptide with HTPu.HTPy duplex in buffer (pH 7.0) (a) and HTPy in buffer (pH 5.7) (c) containing 0.5 mM EDTA, 100 mM KCl at 25°C. QW10 = 4  $\mu\text{M}$  was titrated with equimolar preformed HTPu.HTPy duplex and i-motif structure in an increasing concentration. Normalized fluorescence intensity at 348 nm ( $F_{348}$ ), 346 nm ( $F_{346}$ ), with various concentrations of HTPu.HTPy duplex in KCl (b), HTPy i-motif (d) at 25°C respectively.

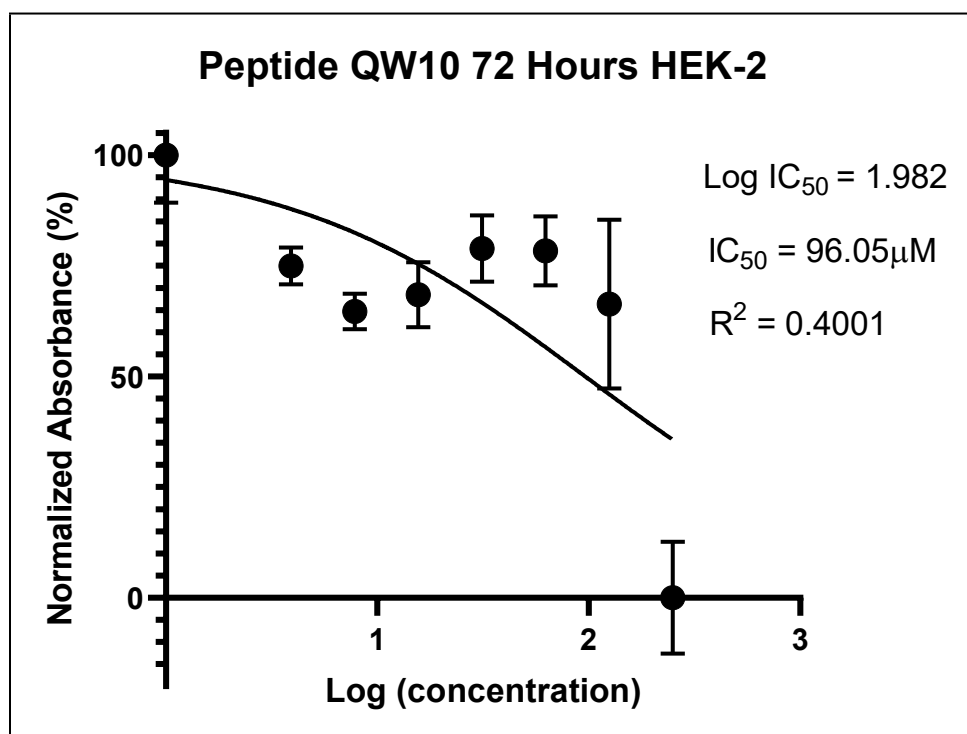

**Figure S4.** QW10 demonstrated the normal effects on human embryonic kidney cells HEK-2 (A). Difference in absorbance is due to the different rate of formazan formation at 72 h of cells incubated with QW10 at concentrations ranging from  $40 \mu M$  down to  $39 \text{ nM}$ . The data is analyzed by comparing the changes in the absorbance from cells with media only (control).
